# Supplementary material
Source: HighWire-hosted journal article supplement (https://bmjopen.bmj.com/content/8/2/e019210)
Supplement: inline-supplementary-material-1 [file inline-supplementary-material-1.pdf]

## Supplemental material

**Table 1. Amino acid profile of the intervention product**

| Amino acid       | Grams per 100 gram |
|------------------|--------------------|
| Serine           | 0.473              |
| Glutamic acid    | 1.58               |
| Proline          | 0.560              |
| Glycine          | 0.166              |
| Alanine          | 0.499              |
| Valine           | 0.527              |
| Isoleucine       | 0.546              |
| Leucine          | 0.998              |
| Tyrosine         | 0.258              |
| Phenylalanine    | 0.291              |
| Lysine           | 0.852              |
| Histidine        | 0.170              |
| Arginine         | 0.242              |
| Aspartic acid    | 0.947              |
| Threonine        | 0.620              |
| Tryptophan       | 0.137              |
| Cystein +Cystine | 0.181              |
| Methionine       | 0.210              |

Particulated whey protein concentrate, name: Nutralac YO-8078.  
Analysis performed by Eurofins Steins Laboratorium A/S, DK.
